# Supplementary material
Source: publisher site journal article supplement (https://www.spandidos-publications.com/8652/downloadSupplementary)
Supplement: Supplementary file 1 [file downloadSupplementary]

Table SI. Multivariable analysis of tumor-infiltrating immune cells according to FAP status using generalized linear models.

| <b>Outcome</b>                       | <b>Ratio (FAP<sup>+</sup> vs. FAP<sup>-</sup>)</b> | <b>95% CI</b> | <b>P-value</b> |
|--------------------------------------|----------------------------------------------------|---------------|----------------|
| FOXP3 <sup>+</sup> /CD3 <sup>+</sup> | 0.431                                              | 0.317-0.586   | <0.001         |
| FOXP3 <sup>+</sup> /CD8 <sup>+</sup> | 0.511                                              | 0.356-0.732   | <0.001         |
| CD163 <sup>+</sup>                   | 0.938                                              | 0.881-0.999   | 0.047          |

CI, confidence interval; FAP, fibroblast activation protein  $\alpha$ .
